# Supplementary material
Source: MDPI journal article supplement (https://www.mdpi.com/2624-862X/4/1/11)
Supplement: s1 [file s1]

## Supplementary materials

**Table S1:** Details of parent proteins from which peptides were derived. The last column indicate peptides from this parent protein were detected to have significant higher intensity in the AprX-hydrolysed samples than the blank UHT milk samples.

| Protein IDs    | Fasta headers                                                                              | Peptide counts (all) | Mol. weight [kDa] | Sequence lengths | Higher in AprX |
|----------------|--------------------------------------------------------------------------------------------|----------------------|-------------------|------------------|----------------|
| P02666         | Beta-casein                                                                                | 738                  | 25.107            | 224              | ✓              |
| P02662         | Alpha-S1-casein                                                                            | 576                  | 24.529            | 214              | ✓              |
| P02668         | Kappa-casein                                                                               | 190                  | 21.269            | 190              | ✓              |
| P02754         | Beta-lactoglobulin                                                                         | 216                  | 19.883            | 178              | ✓              |
| P02663         | Alpha-S2-casein                                                                            | 279                  | 26.018            | 222              | ✓              |
| P80195         | Glycosylation-dependent cell adhesion molecule 1                                           | 124                  | 17.151            | 153              | ✓              |
| Q0IIA4         | Glycoprotein 2 (Zymogen granule membrane)                                                  | 27                   | 59.232            | 534              | ✓              |
| P81265         | Polymeric immunoglobulin receptor                                                          | 65                   | 82.434            | 757              | ✓              |
| P31096         | Osteopontin                                                                                | 51                   | 30.904            | 278              | ✓              |
| P80025         | Lactoperoxidase                                                                            | 25                   | 80.641            | 712              | ✓              |
| P18892         | Butyrophilin subfamily 1 member A1                                                         | 35                   | 59.276            | 526              | ✓              |
| Q27960         | Sodium-dependent phosphate transport protein 2B                                            | 21                   | 75.825            | 693              | ✓              |
| P80457         | Xanthine dehydrogenase/oxidase                                                             | 5                    | 146.79            | 1332             |                |
| P17248         | Tryptophan--tRNA ligase, cytoplasmic                                                       | 2                    | 53.811            | 476              |                |
| Q9TUM6         | BOVIN Perilipin-2                                                                          | 24                   | 49.368            | 450              | ✓              |
| P00711         | Alpha-lactalbumin                                                                          | 17                   | 16.246            | 142              |                |
| P11151         | Lipoprotein lipase                                                                         | 7                    | 53.377            | 478              | ✓              |
| Q5EA98         | Microfibrillar-associated protein 1                                                        | 1                    | 51.977            | 439              |                |
| P01888         | Beta-2-microglobulin                                                                       | 2                    | 13.677            | 118              |                |
| Q05927         | 5-nucleotidase                                                                             | 2                    | 62.965            | 574              | ✓              |
| Q71SP7         | Fatty acid synthase                                                                        | 5                    | 274.55            | 2513             | ✓              |
| P02769; P49065 | Serum albumin                                                                              | 10                   | 69.161            | 606;607; 607     |                |
| Q9MZ06         | Fibroblast growth factor-binding protein 1                                                 | 8                    | 26.188            | 234              | ✓              |
| Q1RMN8;A4IF10  | Immunoglobulin light chain, lambda gene cluster                                            | 4                    | 24.536            | 234;235          |                |
| A7E340         | Mucin 15, cell surface associated                                                          | 7                    | 35.685            | 330              | ✓              |
| P08037         | Beta-1,4-galactosyltransferase 1                                                           | 4                    | 44.842            | 402              |                |
| Q9XS94         | Major fibrous sheath protein                                                               | 2                    | 93.987            | 848              | ✓              |
| Q5EA54         | Solute carrier family 3 (Activators of dibasic and neutral amino acid transport), member 2 | 1                    | 63.21             | 572              |                |
| P58073         | Parathyroid hormone-related protein                                                        | 5                    | 20.408            | 177              | ✓              |
| Q3ZCL0         | Cysteine-rich secretory protein 2                                                          | 3                    | 27.453            | 244              |                |
| Q2UVX4         | Complement C3                                                                              | 4                    | 187.25            | 1661             | ✓              |
| A6QQA8         | Sulfhydryl oxidase                                                                         | 2                    | 62.974            | 567              | ✓              |
| Q76LV1;Q76LV2  | Heat shock protein HSP 90-beta                                                             | 3                    | 83.252            | 724;733          | ✓              |
| Q0P569         | Nucleobindin-1                                                                             | 4                    | 54.982            | 474              |                |

| Protein IDs                 | Fasta headers                                          | Peptide counts (all) | Mol. weight [kDa] | Sequence lengths | Higher in AprX |
|-----------------------------|--------------------------------------------------------|----------------------|-------------------|------------------|----------------|
| Q4GZT4                      | ATP-binding cassette sub-family G member 2             | 1                    | 72.724            | 655              | ✓              |
| P61823                      | Ribonuclease pancreatic                                | 1                    | 16.461            | 150              |                |
| Q8WML4                      | Mucin-1                                                | 3                    | 58.091            | 580              | ✓              |
| P24627                      | Lactotransferrin                                       | 2                    | 78.056            | 708              |                |
| P10790                      | Fatty acid-binding protein                             | 1                    | 14.779            | 133              |                |
| P62992;P63048;P0CG53;P0CH28 | Ubiquitin-40S ribosomal protein S27a                   | 2                    | 17.965            | 156;128;305;690  |                |
| Q6QRN7                      | PP1201 protein                                         | 2                    | 33.948            | 308              |                |
| P35541                      | Serum amyloid A protein                                | 2                    | 14.516            | 130              |                |
| P01035                      | Cystatin-C                                             | 1                    | 16.265            | 148              |                |
| Q95122                      | Monocyte differentiation antigen CD14                  | 1                    | 39.666            | 373              |                |
| P38408                      | Guanine nucleotide-binding protein subunit alpha-14    | 1                    | 41.498            | 355              |                |
| Q0VCX2                      | 78 kDa glucose-regulated protein                       | 1                    | 72.399            | 655              |                |
| Q3T178                      | Vacuolar protein sorting-associated protein 28 homolog | 1                    | 25.484            | 221              |                |

**Table S2:** Differing peptide sequences by LTI.

|                            | Sequence                       | Protein group | Log 10 fold change | p-value | Amino acid before | First amino acid | Last amino acid | Amino acid after | Start position | End position | Length |
|----------------------------|--------------------------------|---------------|--------------------|---------|-------------------|------------------|-----------------|------------------|----------------|--------------|--------|
| Peptides higher in SM+AprX | EELNVPGE                       | Beta-casein   | -0.5843            | <0.0001 | L                 | E                | E               | I                | 19             | 26           | 8      |
|                            | ESLSSEESITR                    | Beta-casein   | -0.7138            | 0.0039  | V                 | E                | R               | I                | 29             | 40           | 12     |
|                            | SITRINKK                       | Beta-casein   | -1.0485            | 0.0025  | E                 | S                | K               | I                | 37             | 44           | 8      |
|                            | ITRINKK                        | Beta-casein   | -1.5296            | 0.0241  | S                 | I                | K               | I                | 38             | 44           | 7      |
|                            | INKKIEK                        | Beta-casein   | -1.1594            | 0.0090  | R                 | I                | K               | F                | 41             | 47           | 7      |
|                            | IEKFQSEEQQTDELQDKI<br>HPFAQTQS | Beta-casein   | -2.1872            | 0.0001  | K                 | I                | S               | L                | 45             | 72           | 28     |
|                            | FQSEEQQTDELQDKIHFP             | Beta-casein   | -0.6608            | 0.0059  | K                 | F                | F               | A                | 48             | 67           | 20     |
|                            | FQSEEQQTDELQDKIHFP<br>AQTQS    | Beta-casein   | -0.5741            | 0.0009  | K                 | F                | S               | L                | 48             | 72           | 25     |
|                            | SEEQQTEDELQD                   | Beta-casein   | -0.6987            | 0.0054  | Q                 | S                | D               | K                | 50             | 62           | 13     |
|                            | TEDELQDKIHP                    | Beta-casein   | -0.9307            | <0.0001 | Q                 | T                | P               | F                | 56             | 66           | 11     |
|                            | KIHHPFAQTQS                    | Beta-casein   | -0.9446            | 0.0068  | D                 | K                | S               | L                | 63             | 72           | 10     |
|                            | HPFAQTQS                       | Beta-casein   | -1.6230            | 0.0030  | I                 | H                | S               | L                | 65             | 72           | 8      |
|                            | HPFAQTQ                        | Beta-casein   | -1.2578            | 0.0009  | I                 | H                | Q               | S                | 65             | 71           | 7      |
|                            | TQTPVVVPPFLQPEVMGVS<br>KVKEA   | Beta-casein   | -0.8663            | 0.0072  | L                 | T                | A               | M                | 93             | 116          | 24     |
|                            | QPEVMGVSKVKEA                  | Beta-casein   | -0.8839            | 0.0044  | L                 | Q                | A               | M                | 104            | 116          | 13     |
|                            | VMGVSKVKE                      | Beta-casein   | -1.2599            | 0.0046  | E                 | V                | E               | A                | 107            | 115          | 9      |
|                            | MGVSKVKEA                      | Beta-casein   | -0.6874            | 0.0023  | V                 | M                | A               | M                | 108            | 116          | 9      |
|                            | GVSKVKE                        | Beta-casein   | -1.4552            | 0.0032  | M                 | G                | E               | A                | 109            | 115          | 7      |
|                            | KEAMAPK                        | Beta-casein   | -1.3473            | 0.0020  | V                 | K                | K               | H                | 114            | 120          | 7      |
|                            | EAMAPKH                        | Beta-casein   | -1.4540            | 0.0106  | K                 | E                | H               | K                | 115            | 121          | 7      |
|                            | FTESQSLTL                      | Beta-casein   | -0.9198            | 0.0120  | P                 | F                | L               | T                | 134            | 142          | 9      |

|  | Sequence              | Protein group   | Log 10 fold change | p-value | Amino acid before | First amino acid | Last amino acid | Amino acid after | Start position | End position | Length |
|--|-----------------------|-----------------|--------------------|---------|-------------------|------------------|-----------------|------------------|----------------|--------------|--------|
|  | WMHQPHQPLPPTVMFPPQS   | Beta-casein     | -1.0136            | 0.0016  | S                 | W                | S               | V                | 158            | 176          | 19     |
|  | VMFPPQS               | Beta-casein     | -1.1825            | 0.0054  | T                 | V                | S               | V                | 170            | 176          | 7      |
|  | SQSKVLPVP             | Beta-casein     | -0.7365            | 0.0027  | L                 | S                | P               | Q                | 181            | 189          | 9      |
|  | KAVPYPQRD             | Beta-casein     | -1.3501            | 0.0116  | Q                 | K                | D               | M                | 191            | 199          | 9      |
|  | KAVPYPQ               | Beta-casein     | -1.0703            | 0.0020  | Q                 | K                | Q               | R                | 191            | 197          | 7      |
|  | KHQGLPQEV             | Alpha-S1-casein | -1.6726            | 0.0011  | I                 | K                | L               | N                | 22             | 31           | 10     |
|  | HQGLPQE               | Alpha-S1-casein | -1.9143            | 0.0041  | K                 | H                | E               | V                | 23             | 29           | 7      |
|  | FGKEKVNE              | Alpha-S1-casein | -1.4346            | 0.0007  | V                 | F                | E               | L                | 47             | 54           | 8      |
|  | VPSEYLGYLEQLL         | Alpha-S1-casein | -0.5292            | 0.0031  | D                 | V                | L               | R                | 101            | 114          | 14     |
|  | KKYKVPQ               | Alpha-S1-casein | -1.9093            | 0.0027  | L                 | K                | Q               | L                | 117            | 123          | 7      |
|  | LHSMKEG               | Alpha-S1-casein | -1.0177            | 0.0109  | R                 | L                | G               | I                | 135            | 141          | 7      |
|  | HSMKEGIHAQQKEPM       | Alpha-S1-casein | -1.3291            | 0.0014  | L                 | H                | M               | I                | 136            | 150          | 15     |
|  | IHAQQKEP              | Alpha-S1-casein | -1.2844            | 0.0003  | G                 | I                | P               | M                | 142            | 149          | 8      |
|  | HAQQKEPMIG            | Alpha-S1-casein | -1.5918            | <0.0001 | I                 | H                | G               | V                | 143            | 152          | 10     |
|  | HAQQKEP               | Alpha-S1-casein | -1.2237            | 0.0096  | I                 | H                | P               | M                | 143            | 149          | 7      |
|  | AQQKEPM               | Alpha-S1-casein | -1.5439            | 0.0010  | H                 | A                | M               | I                | 144            | 150          | 7      |
|  | IGVNQEL               | Alpha-S1-casein | -1.6067            | 0.0016  | M                 | I                | L               | A                | 151            | 157          | 7      |
|  | PSFSDIPNPIGSENSEKTTMP | Alpha-S1-casein | -1.4067            | 0.0040  | A                 | P                | P               | L                | 192            | 212          | 21     |
|  | PNPIGSENSEKTTMP       | Alpha-S1-casein | -1.0467            | 0.0081  | I                 | P                | P               | L                | 198            | 212          | 15     |
|  | ALNEINQ               | Alpha-S2-casein | -0.6641            | 0.0062  | K                 | A                | Q               | F                | 96             | 102          | 7      |
|  | KLTEEEKNR             | Alpha-S2-casein | -1.1815            | 0.0023  | T                 | K                | R               | L                | 167            | 175          | 9      |
|  | FLKKISQ               | Alpha-S2-casein | -1.2629            | 0.0071  | N                 | F                | Q               | R                | 178            | 184          | 7      |
|  | KISQRYQKF             | Alpha-S2-casein | -1.7191            | 0.0010  | K                 | K                | F               | A                | 181            | 189          | 9      |
|  | PQYLKTVYQHQ           | Alpha-S2-casein | -0.7207            | 0.0061  | L                 | P                | Q               | K                | 192            | 202          | 11     |

|  | Sequence           | Protein group       | Log 10 fold change | p-value       | Amino acid before | First amino acid | Last amino acid | Amino acid after | Start position | End position | Length    |
|--|--------------------|---------------------|--------------------|---------------|-------------------|------------------|-----------------|------------------|----------------|--------------|-----------|
|  | KTVYQHQQK          | Alpha-S2-casein     | -1.6593            | 0.0008        | L                 | K                | K               | A                | 196            | 203          | 8         |
|  | TVYQHQQKAM         | Alpha-S2-casein     | -1.1891            | 0.0046        | K                 | T                | M               | K                | 197            | 205          | 9         |
|  | KAMKPWIQPK         | Alpha-S2-casein     | -1.2092            | 0.0003        | Q                 | K                | K               | T                | 203            | 212          | 10        |
|  | KAMKPWIQPKT        | Alpha-S2-casein     | -0.8662            | 0.0109        | Q                 | K                | T               | K                | 203            | 213          | 11        |
|  | PWIQPKTKVIP        | Alpha-S2-casein     | -0.5818            | 0.0027        | K                 | P                | P               | Y                | 207            | 217          | 11        |
|  | KVIPYVR            | Alpha-S2-casein     | -1.0524            | 0.0059        | T                 | K                | R               | Y                | 214            | 220          | 7         |
|  | VLSRYPS            | Kappa-casein        | -0.9401            | 0.0101        | Y                 | V                | S               | Y                | 52             | 58           | 7         |
|  | VLSRYPSYG          | Kappa-casein        | -0.8316            | 0.0101        | Y                 | V                | G               | L                | 52             | 60           | 9         |
|  | YGLNYYQQKP         | Kappa-casein        | -1.1033            | 0.0152        | S                 | Y                | P               | V                | 59             | 68           | 10        |
|  | NYYQQKP            | Kappa-casein        | -0.6384            | 0.0011        | L                 | N                | P               | V                | 62             | 68           | 7         |
|  | YYQQKPV            | Kappa-casein        | -1.6701            | 0.0016        | N                 | Y                | V               | A                | 63             | 69           | 7         |
|  | YQQKPVAL           | Kappa-casein        | -0.9452            | 0.0068        | Y                 | Y                | L               | I                | 64             | 71           | 8         |
|  | AVRSPAQ            | Kappa-casein        | -0.9103            | 0.0106        | A                 | A                | Q               | I                | 87             | 93           | 7         |
|  | <b>TMARHPPH</b>    | <b>Kappa-casein</b> | <b>-1.9399</b>     | <b>0.0005</b> | <b>T</b>          | <b>T</b>         | <b>H</b>        | <b>L</b>         | <b>115</b>     | <b>123</b>   | <b>9</b>  |
|  | <b>TMARHPPHLSF</b> | <b>Kappa-casein</b> | <b>-0.7175</b>     | <b>0.0002</b> | <b>T</b>          | <b>T</b>         | <b>F</b>        | <b>M</b>         | <b>115</b>     | <b>126</b>   | <b>12</b> |
|  | <b>VQVTSTA</b>     | <b>Kappa-casein</b> | <b>-0.6943</b>     | <b>0.0005</b> | <b>T</b>          | <b>V</b>         | <b>A</b>        | <b>V</b>         | <b>183</b>     | <b>189</b>   | <b>7</b>  |
|  | AMAASDISLLDAQSAP   | Beta-lactoglobulin  | -1.5055            | 0.0006        | L                 | A                | P               | L                | 39             | 54           | 16        |
|  | LDAQSAPLR          | Beta-lactoglobulin  | -0.6976            | 0.0020        | L                 | L                | R               | V                | 48             | 56           | 9         |
|  | VEELKPTPEGDLEILL   | Beta-lactoglobulin  | -0.6786            | 0.0022        | Y                 | V                | L               | Q                | 59             | 74           | 16        |
|  | LKPTPEGDLE         | Beta-lactoglobulin  | -0.7845            | 0.0051        | E                 | L                | E               | I                | 62             | 71           | 10        |
|  | KKIIAEKT           | Beta-lactoglobulin  | -2.0448            | 0.0012        | Q                 | K                | T               | K                | 85             | 92           | 8         |
|  | KIPAVFK            | Beta-lactoglobulin  | -1.9462            | <0.0001       | T                 | K                | K               | I                | 93             | 99           | 7         |
|  | VDDEALEK           | Beta-lactoglobulin  | -2.0315            | 0.0001        | E                 | V                | K               | F                | 144            | 151          | 8         |

|  | Sequence        | Protein group                                    | Log 10 fold change | p-value | Amino acid before | First amino acid | Last amino acid | Amino acid after | Start position | End position | Length |
|--|-----------------|--------------------------------------------------|--------------------|---------|-------------------|------------------|-----------------|------------------|----------------|--------------|--------|
|  | IRLSFNPT        | Beta-lactoglobulin                               | -0.7458            | <0.0001 | H                 | I                | T               | Q                | 163            | 170          | 8      |
|  | NKPEDETH        | Glycosylation-dependent cell adhesion molecule 1 | -0.9185            | 0.0132  | L                 | N                | H               | L                | 21             | 28           | 8      |
|  | LISKEQIVI       | Glycosylation-dependent cell adhesion molecule 1 | -0.4470            | 0.0010  | D                 | L                | I               | R                | 62             | 70           | 9      |
|  | ISKEQIVIR       | Glycosylation-dependent cell adhesion molecule 1 | -0.7384            | 0.0051  | L                 | I                | R               | S                | 63             | 71           | 9      |
|  | IVIRSSRQPQ      | Glycosylation-dependent cell adhesion molecule 1 | -2.1481            | 0.0003  | Q                 | I                | Q               | S                | 68             | 77           | 10     |
|  | SSRQPQSQNPKLPL  | Glycosylation-dependent cell adhesion molecule 1 | -1.2167            | 0.0199  | R                 | S                | P               | L                | 72             | 84           | 13     |
|  | SSRQPQSQNPKLPLS | Glycosylation-dependent cell adhesion molecule 1 | -1.6997            | 0.0032  | R                 | S                | S               | I                | 72             | 86           | 15     |
|  | SSRQPQSQNP      | Glycosylation-dependent cell adhesion molecule 1 | -1.5439            | 0.0028  | R                 | S                | P               | K                | 72             | 81           | 10     |
|  | RQPQSQNPKLPL    | Glycosylation-dependent cell adhesion molecule 1 | -1.2258            | 0.0147  | S                 | R                | L               | S                | 74             | 85           | 12     |
|  | KQSNSKY         | Immunoglobulin light chain, lambda gene cluster  | -1.1014            | 0.0041  | S                 | K                | Y               | A                | 188            | 194          | 7      |
|  | QRPPKIQVY       | Beta-2-microglobulin                             | -1.4791            | <0.0001 | I                 | Q                | Y               | S                | 22             | 30           | 9      |
|  | DGVAKLS         | Complement C3                                    | -0.9203            | 0.0081  | D                 | D                | S               | I                | 402            | 408          | 7      |
|  | DRITGGKDFRDIES  | Lipoprotein lipase                               | -0.8172            | 0.0005  | A                 | D                | S               | K                | 29             | 42           | 14     |
|  | DELKRQEVS       | Nucleobindin-1                                   | -1.0866            | 0.0161  | L                 | D                | S               | R                | 98             | 106          | 9      |
|  | KPDPSQKQT       | Osteopontin                                      | -0.9264            | 0.0027  | L                 | K                | T               | F                | 45             | 53           | 9      |

|                                | Sequence                      | Protein group                     | Log 10 fold change | p-value | Amino acid before | First amino acid | Last amino acid | Amino acid after | Start position | End position | Length |
|--------------------------------|-------------------------------|-----------------------------------|--------------------|---------|-------------------|------------------|-----------------|------------------|----------------|--------------|--------|
|                                | SVAYGLKSRSKKF                 | Osteopontin                       | -0.8283            | 0.0102  | D                 | S                | F               | R                | 155            | 167          | 13     |
|                                | AAPAGAAIQS                    | Polymeric immunoglobulin receptor | -0.6642            | 0.0049  | K                 | A                | S               | R                | 576            | 585          | 10     |
|                                | AGEIQNKAL                     | Polymeric immunoglobulin receptor | -0.9442            | 0.0127  | R                 | A                | L               | L                | 587            | 595          | 9      |
|                                | GSSKALVSTLVPLA                | Polymeric immunoglobulin receptor | -0.4460            | 0.0011  | S                 | G                | A               | L                | 627            | 640          | 14     |
|                                | DTHKSEIAHRF                   | Serum albumin                     | -1.6288            | 0.0001  | R                 | D                | F               | K                | 24             | 34           | 11     |
|                                | VKSVASLG                      | Xanthine dehydrogenase/oxidase    | -1.5281            | 0.0141  | Q                 | V                | G               | G                | 342            | 349          | 8      |
| Peptides higher in SM+AprX+LTI | LEELNVPGEIVE                  | Beta-casein                       | 0.5915             | 0.0014  | E                 | L                | E               | S                | 18             | 29           | 12     |
|                                | VMFPPQSVLS                    | Beta-casein                       | 0.6033             | 0.0015  | T                 | V                | S               | L                | 170            | 179          | 10     |
|                                | VLSLSQSKVLPVPQ                | Beta-casein                       | 1.6872             | 0.0179  | S                 | V                | Q               | K                | 177            | 190          | 14     |
|                                | LSQSKVLPVPQKAVPYPQR<br>DMPIQA | Beta-casein                       | 0.6002             | 0.0003  | S                 | L                | A               | F                | 180            | 204          | 25     |
|                                | VPYPQRDMPIQA                  | Beta-casein                       | 1.1906             | 0.0003  | A                 | V                | A               | F                | 193            | 204          | 12     |
|                                | RDMPIQAFL                     | Beta-casein                       | 0.6851             | 0.0048  | Q                 | R                | L               | Y                | 198            | 207          | 10     |
|                                | RPKHPIKHQGLPQEVLENL           | Alpha-S1-casein                   | 1.9692             | 0.0104  | A                 | R                | L               | L                | 16             | 35           | 20     |
|                                | HQGLPQEVLENLL                 | Alpha-S1-casein                   | 0.4842             | 0.0003  | K                 | H                | L               | R                | 23             | 36           | 14     |
|                                | VAPFPEVFGKEKVNEL              | Alpha-S1-casein                   | 0.8345             | 0.0045  | F                 | V                | L               | S                | 40             | 55           | 16     |
|                                | KVPQLEIVPNSAEERLHSMK<br>EG    | Alpha-S1-casein                   | 2.0654             | <0.0001 | Y                 | K                | G               | I                | 120            | 141          | 22     |
|                                | LEIVPNSAEERLHSMKEG            | Alpha-S1-casein                   | 1.1587             | 0.0006  | Q                 | L                | G               | I                | 124            | 141          | 18     |
|                                | EGIHAAQKQKPMIGVNQ             | Alpha-S1-casein                   | 0.9144             | 0.0102  | K                 | E                | Q               | E                | 140            | 155          | 16     |
|                                | IHAQKQKPMIGVNQELA             | Alpha-S1-casein                   | 1.8628             | <0.0001 | G                 | I                | A               | Y                | 142            | 158          | 17     |
|                                | QGPIVLNPWDQVK                 | Alpha-S2-casein                   | 1.2117             | 0.0010  | Y                 | Q                | K               | R                | 116            | 128          | 13     |
|                                | LINNQLFPYPYYA                 | Kappa-casein                      | 1.2366             | 0.0002  | A                 | L                | A               | K                | 71             | 83           | 13     |
|                                | INNQLFPYPYYA                  | Kappa-casein                      | 0.9053             | 0.0004  | L                 | I                | A               | K                | 72             | 83           | 12     |

|                                   | Sequence                    | Protein group                                    | Log 10 fold change | p-value       | Amino acid before | First amino acid | Last amino acid | Amino acid after | Start position | End position | Length   |
|-----------------------------------|-----------------------------|--------------------------------------------------|--------------------|---------------|-------------------|------------------|-----------------|------------------|----------------|--------------|----------|
|                                   | FLPYPYA                     | Kappa-casein                                     | 1.2008             | 0.0050        | Q                 | F                | A               | K                | 76             | 83           | 8        |
|                                   | QILWQVL                     | Kappa-casein                                     | 0.7815             | 0.0053        | A                 | Q                | L               | S                | 93             | 100          | 8        |
|                                   | ILWQVL                      | Kappa-casein                                     | 0.6821             | 0.0071        | Q                 | I                | L               | S                | 94             | 100          | 7        |
|                                   | <b>RHPHPLSF</b>             | <b>Kappa-casein</b>                              | <b>0.8695</b>      | <b>0.0034</b> | <b>A</b>          | <b>R</b>         | <b>F</b>        | <b>M</b>         | <b>118</b>     | <b>126</b>   | <b>9</b> |
|                                   | VEELKPTPEGDLEIL             | Beta-lactoglobulin                               | 0.4452             | 0.0001        | Y                 | V                | L               | L                | 59             | 73           | 15       |
|                                   | ILNKPEDETHLEAQPTDASA QFI    | Glycosylation-dependent cell adhesion molecule 1 | 2.1153             | 0.0006        | A                 | I                | I               | R                | 19             | 41           | 23       |
|                                   | LNKPEDETHLEAQPTDASA QFIRNLQ | Glycosylation-dependent cell adhesion molecule 1 | 1.5057             | 0.0150        | I                 | L                | Q               | I                | 20             | 45           | 26       |
|                                   | KPEDETHLEAQPTDASAQF         | Glycosylation-dependent cell adhesion molecule 1 | 0.8986             | 0.0059        | N                 | K                | F               | I                | 22             | 40           | 19       |
|                                   | VGVHPPLQGSSHGAAAIGQP SGELRL | Beta-1,4-galactosyltransferase 1                 | 1.6472             | 0.0010        | L                 | V                | L               | R                | 54             | 79           | 26       |
|                                   | KAFLDSRTRL                  | Lactoperoxidase                                  | 1.5394             | 0.0011        | N                 | K                | L               | K                | 47             | 56           | 10       |
| <b>Peptides higher in FM+AprX</b> | EKFQSEEQQTEDELQDKIH P       | Beta-casein                                      | -1.3218            | 0.0003        | I                 | E                | P               | F                | 46             | 66           | 21       |
|                                   | LQPEVMGVS                   | Beta-casein                                      | -0.4501            | 0.0028        | F                 | L                | S               | K                | 103            | 111          | 9        |
|                                   | VSKVKEAMAPK                 | Beta-casein                                      | -0.8267            | 0.0032        | G                 | V                | K               | H                | 110            | 120          | 11       |
|                                   | AMAPKHKEMPFP                | Beta-casein                                      | -0.6816            | 0.0027        | E                 | A                | P               | K                | 116            | 127          | 12       |
|                                   | APKHKEMPFP                  | Beta-casein                                      | -1.0089            | <0.0001       | M                 | A                | P               | K                | 118            | 127          | 10       |
|                                   | TESQSLT                     | Beta-casein                                      | -1.0848            | 0.0005        | F                 | T                | T               | L                | 135            | 141          | 7        |
|                                   | HQPHQPLPPT                  | Beta-casein                                      | -1.0521            | <0.0001       | M                 | H                | T               | V                | 160            | 169          | 10       |
|                                   | VLPVPQKAVPYPQRDMPIQ A       | Beta-casein                                      | -0.6612            | 0.0004        | K                 | V                | A               | F                | 185            | 204          | 20       |
|                                   | AVPYPQRDMPIQA               | Beta-casein                                      | -0.7613            | 0.0107        | K                 | A                | A               | F                | 192            | 204          | 13       |
|                                   | KHIQKEDVP SER               | Alpha-S1-casein                                  | -1.4111            | 0.0007        | Q                 | K                | R               | Y                | 94             | 105          | 12       |



|  | Sequence           | Protein group                                    | Log 10 fold change | p-value       | Amino acid before | First amino acid | Last amino acid | Amino acid after | Start position | End position | Length    |
|--|--------------------|--------------------------------------------------|--------------------|---------------|-------------------|------------------|-----------------|------------------|----------------|--------------|-----------|
|  | HIQKEDVPSE         | Alpha-S1-casein                                  | -0.5579            | 0.0039        | K                 | H                | R               | Y                | 95             | 105          | 11        |
|  | IQKEDVPSE          | Alpha-S1-casein                                  | -0.6132            | 0.0005        | H                 | I                | Y               | L                | 96             | 106          | 11        |
|  | KEDVPSE            | Alpha-S1-casein                                  | -1.4112            | 0.0090        | Q                 | K                | E               | R                | 98             | 104          | 7         |
|  | LGYLEQLLR          | Alpha-S1-casein                                  | -0.3543            | 0.0005        | Y                 | L                | R               | L                | 107            | 115          | 9         |
|  | NSEKTTMP           | Alpha-S1-casein                                  | -0.8696            | 0.0004        | E                 | N                | P               | L                | 205            | 212          | 8         |
|  | ITVDDKH            | Alpha-S2-casein                                  | -0.7826            | 0.0094        | K                 | I                | H               | Y                | 86             | 92           | 7         |
|  | TVDDKHY            | Alpha-S2-casein                                  | -0.7824            | 0.0037        | I                 | T                | Y               | Q                | 87             | 93           | 7         |
|  | LTEEEKNRL          | Alpha-S2-casein                                  | -0.5805            | 0.0033        | K                 | L                | L               | N                | 168            | 176          | 9         |
|  | VYQHQKAM           | Alpha-S2-casein                                  | -1.0697            | 0.0060        | T                 | V                | M               | K                | 198            | 205          | 8         |
|  | KAMKPWIQP          | Alpha-S2-casein                                  | -0.4065            | 0.0014        | Q                 | K                | P               | K                | 203            | 211          | 9         |
|  | AMKPWIQPKTK        | Alpha-S2-casein                                  | -1.4551            | 0.0002        | K                 | A                | K               | V                | 204            | 214          | 11        |
|  | TKVIPYVR           | Alpha-S2-casein                                  | -0.6573            | 0.0054        | K                 | T                | R               | Y                | 213            | 220          | 8         |
|  | VLSRYPSYGLNYYQKPVA | Kappa-casein                                     | -1.0824            | 0.0196        | Y                 | V                | A               | L                | 52             | 70           | 19        |
|  | YYQQKPVAL          | Kappa-casein                                     | -0.3850            | 0.0001        | N                 | Y                | L               | I                | 63             | 71           | 9         |
|  | <b>TMARHPPH</b>    | <b>Kappa-casein</b>                              | <b>-1.6366</b>     | <b>0.0121</b> | <b>T</b>          | <b>T</b>         | <b>H</b>        | <b>L</b>         | <b>115</b>     | <b>123</b>   | <b>9</b>  |
|  | <b>TMARHPPHLS</b>  | <b>Kappa-casein</b>                              | <b>-0.8927</b>     | <b>0.0029</b> | <b>T</b>          | <b>T</b>         | <b>S</b>        | <b>F</b>         | <b>115</b>     | <b>125</b>   | <b>11</b> |
|  | TPEVDDEALEKFDKAL   | Beta-lactoglobulin                               | -0.6142            | 0.0009        | R                 | T                | L               | K                | 141            | 156          | 16        |
|  | IVIRSSRQPQ         | Glycosylation-dependent cell adhesion molecule 1 | -1.7614            | 0.0009        | Q                 | I                | Q               | S                | 68             | 77           | 10        |
|  | LPLSILKE           | Glycosylation-dependent cell adhesion molecule 1 | -0.4394            | 0.0013        | K                 | L                | E               | K                | 83             | 90           | 8         |
|  | AHVQVL             | Lactotransferrin                                 | -0.8082            | 0.0017        | A                 | A                | L               | L                | 624            | 630          | 7         |
|  | AGEIQNKA           | Polymeric immunoglobulin receptor                | -1.3216            | 0.0004        | R                 | A                | A               | L                | 587            | 594          | 8         |
|  | DTHKSEIAHRF        | Serum albumin                                    | -0.8169            | 0.0158        | R                 | D                | F               | K                | 24             | 34           | 11        |

|                                | Sequence                   | Protein group                  | Log 10 fold change | p-value | Amino acid before | First amino acid | Last amino acid | Amino acid after | Start position | End position | Length |
|--------------------------------|----------------------------|--------------------------------|--------------------|---------|-------------------|------------------|-----------------|------------------|----------------|--------------|--------|
|                                | KLPTQKT                    | Xanthine dehydrogenase/oxidase | -1.7934            | <0.0001 | A                 | K                | T               | E                | 318            | 324          | 7      |
| Peptides higher in FM+AprX+LTI | RELEELNVPGEIVESLS          | Beta-casein                    | 0.5408             | 0.0069  | A                 | R                | S               | S                | 16             | 32           | 17     |
|                                | IEKFQSEEQQQTEDELQDKI HPF   | Beta-casein                    | 0.6972             | 0.0014  | K                 | I                | F               | A                | 45             | 67           | 23     |
|                                | ELQDKIHP                   | Beta-casein                    | 1.5036             | 0.0046  | D                 | E                | P               | F                | 59             | 66           | 8      |
|                                | KIHPFAQTQS                 | Beta-casein                    | 0.6829             | 0.0006  | D                 | K                | S               | L                | 63             | 72           | 10     |
|                                | HPFAQTQ                    | Beta-casein                    | 1.2820             | 0.0006  | I                 | H                | Q               | S                | 65             | 71           | 7      |
|                                | SLPQNIPPLTQTPVVPPFLQ PEVMG | Beta-casein                    | 2.1611             | 0.0024  | N                 | S                | G               | V                | 84             | 109          | 26     |
|                                | QPEVMGVSKVKEA              | Beta-casein                    | 0.7390             | 0.0020  | L                 | Q                | A               | M                | 104            | 116          | 13     |
|                                | VMGVSKVKE                  | Beta-casein                    | 1.3490             | 0.0026  | E                 | V                | E               | A                | 107            | 115          | 9      |
|                                | MGVSKVKEA                  | Beta-casein                    | 1.0357             | 0.0125  | V                 | M                | A               | M                | 108            | 116          | 9      |
|                                | SKVKEAM                    | Beta-casein                    | 0.8323             | 0.0061  | V                 | S                | M               | A                | 111            | 117          | 7      |
|                                | KYPVEPFOTES                | Beta-casein                    | 0.7219             | 0.0076  | P                 | K                | S               | Q                | 128            | 137          | 10     |
|                                | QSWMHQPH                   | Beta-casein                    | 1.7925             | 0.0002  | L                 | Q                | H               | Q                | 156            | 163          | 8      |
|                                | RDMP IQA                   | Beta-casein                    | 0.6770             | 0.0014  | Q                 | R                | A               | F                | 198            | 204          | 7      |
|                                | RPKHPIK                    | Alpha-S1-casein                | 2.0576             | 0.0012  | A                 | R                | K               | H                | 16             | 22           | 7      |
|                                | RPKHPIKHQG                 | Alpha-S1-casein                | 2.0585             | <0.0001 | A                 | R                | G               | L                | 16             | 25           | 10     |
|                                | HPIKHQGLPQE                | Alpha-S1-casein                | 1.2809             | <0.0001 | K                 | H                | E               | V                | 19             | 29           | 11     |
|                                | HQGLPQEVLENENLLRF          | Alpha-S1-casein                | 0.5776             | 0.0052  | K                 | H                | F               | F                | 23             | 38           | 16     |
|                                | HQGLPQEVLENENLL            | Alpha-S1-casein                | 0.6000             | 0.0014  | K                 | H                | L               | R                | 23             | 36           | 14     |
|                                | FVAPFPEVFGKEKVNEL          | Alpha-S1-casein                | 0.6913             | 0.0024  | F                 | F                | L               | S                | 39             | 55           | 17     |
|                                | PEVFGKEKVNEL               | Alpha-S1-casein                | 0.7808             | 0.0050  | F                 | P                | L               | S                | 44             | 55           | 12     |
|                                | FGKEKVNE                   | Alpha-S1-casein                | 0.8642             | 0.0043  | V                 | F                | E               | L                | 47             | 54           | 8      |
|                                | FGKEKVNEL                  | Alpha-S1-casein                | 1.1872             | 0.0007  | V                 | F                | L               | S                | 47             | 55           | 9      |

|  | Sequence                | Protein group   | Log 10 fold change | p-value | Amino acid before | First amino acid | Last amino acid | Amino acid after | Start position | End position | Length |
|--|-------------------------|-----------------|--------------------|---------|-------------------|------------------|-----------------|------------------|----------------|--------------|--------|
|  | HIQKEDVPS               | Alpha-S1-casein | 1.2070             | 0.0029  | K                 | H                | S               | E                | 95             | 103          | 9      |
|  | HIQKEDVPSE              | Alpha-S1-casein | 1.8426             | <0.0001 | K                 | H                | E               | R                | 95             | 104          | 10     |
|  | IQKEDVPSE               | Alpha-S1-casein | 1.5730             | 0.0004  | H                 | I                | R               | Y                | 96             | 105          | 10     |
|  | ERYLGYLEQ               | Alpha-S1-casein | 0.3803             | 0.0003  | S                 | E                | Q               | L                | 104            | 112          | 9      |
|  | SAEERLHSM               | Alpha-S1-casein | 1.3892             | <0.0001 | N                 | S                | M               | K                | 130            | 138          | 9      |
|  | LHSMKEGIHAQQKEPM        | Alpha-S1-casein | 0.9538             | 0.0023  | R                 | L                | M               | I                | 135            | 150          | 16     |
|  | LHSMKEGIHAQQ            | Alpha-S1-casein | 1.5561             | 0.0003  | R                 | L                | Q               | K                | 135            | 146          | 12     |
|  | HSMKEGIHAQQKEPM         | Alpha-S1-casein | 1.3995             | 0.0005  | L                 | H                | M               | I                | 136            | 150          | 15     |
|  | SMKEGIHAQQKEPM          | Alpha-S1-casein | 1.5232             | 0.0018  | H                 | S                | M               | I                | 137            | 150          | 14     |
|  | MKEGIHAQQKEPMIGVNQE LAY | Alpha-S1-casein | 1.1235             | 0.0080  | S                 | M                | Y               | F                | 138            | 159          | 22     |
|  | KEGIHAQQKEP             | Alpha-S1-casein | 0.6405             | 0.0010  | M                 | K                | P               | M                | 139            | 149          | 11     |
|  | IHAQQKEP                | Alpha-S1-casein | 1.7443             | <0.0001 | G                 | I                | P               | M                | 142            | 149          | 8      |
|  | HAQQKEP                 | Alpha-S1-casein | 0.8158             | 0.0069  | I                 | H                | P               | M                | 143            | 149          | 7      |
|  | PIGSENSEKTTMPLW         | Alpha-S1-casein | 0.6979             | 0.0105  | N                 | P                | W               | -                | 200            | 214          | 15     |
|  | SENSEKTTMPLW            | Alpha-S1-casein | 0.4700             | 0.0004  | G                 | S                | W               | -                | 203            | 214          | 12     |
|  | IISQETYKQEK             | Alpha-S2-casein | 0.7924             | 0.0156  | S                 | I                | K               | N                | 29             | 39           | 11     |
|  | NREQLSTSEENS            | Alpha-S2-casein | 0.5119             | 0.0061  | L                 | N                | S               | K                | 139            | 150          | 12     |
|  | TKLTEEEKNRL             | Alpha-S2-casein | 1.7827             | <0.0001 | K                 | T                | L               | N                | 166            | 176          | 11     |
|  | KISQRYQKF               | Alpha-S2-casein | 0.8682             | 0.0132  | K                 | K                | F               | A                | 181            | 189          | 9      |
|  | YLKTVYQHQ               | Alpha-S2-casein | 1.7842             | <0.0001 | Q                 | Y                | Q               | K                | 194            | 202          | 9      |
|  | LKTVYQHQ                | Alpha-S2-casein | 1.4345             | 0.0008  | Y                 | L                | Q               | K                | 195            | 202          | 8      |
|  | TVYQHQKAM               | Alpha-S2-casein | 1.0371             | 0.0190  | K                 | T                | M               | K                | 197            | 205          | 9      |
|  | KAMKPWIQPKT             | Alpha-S2-casein | 1.2896             | 0.0089  | Q                 | K                | T               | K                | 203            | 213          | 11     |

|  | Sequence               | Protein group                                    | Log 10 fold change | p-value           | Amino acid before | First amino acid | Last amino acid | Amino acid after | Start position | End position | Length    |
|--|------------------------|--------------------------------------------------|--------------------|-------------------|-------------------|------------------|-----------------|------------------|----------------|--------------|-----------|
|  | YYQQKPV                | Kappa-casein                                     | 0.9148             | 0.0013            | N                 | Y                | V               | A                | 63             | 69           | 7         |
|  | LINNQLPYPYYA           | Kappa-casein                                     | 0.7645             | 0.0036            | A                 | L                | A               | K                | 71             | 83           | 13        |
|  | <b>RHPHPHLS</b>        | <b>Kappa-casein</b>                              | <b>1.9511</b>      | <b>0.0056</b>     | <b>A</b>          | <b>R</b>         | <b>S</b>        | <b>F</b>         | <b>118</b>     | <b>125</b>   | <b>8</b>  |
|  | <b>KKNQDKTEIPTINT</b>  | <b>Kappa-casein</b>                              | <b>0.4838</b>      | <b>0.0007</b>     | <b>P</b>          | <b>K</b>         | <b>T</b>        | <b>I</b>         | <b>132</b>     | <b>145</b>   | <b>14</b> |
|  | <b>KKNQDKTEIPT</b>     | <b>Kappa-casein</b>                              | <b>1.7450</b>      | <b>&lt;0.0001</b> | <b>P</b>          | <b>K</b>         | <b>T</b>        | <b>I</b>         | <b>132</b>     | <b>142</b>   | <b>11</b> |
|  | <b>IASGEPTSTPTTE</b>   | <b>Kappa-casein</b>                              | <b>0.9918</b>      | <b>0.0038</b>     | <b>T</b>          | <b>I</b>         | <b>E</b>        | <b>A</b>         | <b>146</b>     | <b>158</b>   | <b>13</b> |
|  | IIAEKTKIP              | Beta-lactoglobulin                               | 1.4816             | 0.0006            | K                 | I                | P               | A                | 87             | 95           | 9         |
|  | NENKVLV                | Beta-lactoglobulin                               | 1.6553             | 0.0003            | L                 | N                | V               | L                | 104            | 110          | 7         |
|  | LKALPMH                | Beta-lactoglobulin                               | 1.1575             | 0.0069            | A                 | L                | H               | I                | 156            | 162          | 7         |
|  | KPEDETHLEAQPTDASAQFIRN | Glycosylation-dependent cell adhesion molecule 1 | 0.6926             | <0.0001           | N                 | K                | N               | L                | 22             | 43           | 22        |
|  | KPEDETHLEAQPTDASAQF    | Glycosylation-dependent cell adhesion molecule 1 | 0.6462             | <0.0001           | N                 | K                | F               | I                | 22             | 40           | 19        |
|  | KPEDETHLEAQPTDASAQ     | Glycosylation-dependent cell adhesion molecule 1 | 1.9871             | <0.0001           | N                 | K                | Q               | F                | 22             | 39           | 18        |
|  | LISKEQIVI              | Glycosylation-dependent cell adhesion molecule 1 | 0.5336             | 0.0068            | D                 | L                | I               | R                | 62             | 70           | 9         |
|  | ISKEQIVIRSS            | Glycosylation-dependent cell adhesion molecule 1 | 1.0395             | 0.0010            | L                 | I                | S               | R                | 63             | 73           | 11        |
|  | SSRQPQSQNP             | Glycosylation-dependent cell adhesion molecule 1 | 0.7048             | 0.0027            | R                 | S                | K               | L                | 72             | 82           | 11        |
|  | RQPQSQNP               | Glycosylation-dependent cell adhesion molecule 1 | 0.7420             | 0.0004            | S                 | R                | P               | K                | 74             | 81           | 8         |
|  | RQPQSQNPKLPL           | Glycosylation-dependent cell adhesion molecule 1 | 0.5531             | 0.0002            | S                 | R                | L               | S                | 74             | 85           | 12        |
|  | RQPQSQNP               | Glycosylation-dependent cell adhesion molecule 1 | 0.8064             | 0.0009            | S                 | R                | K               | L                | 74             | 82           | 9         |
|  | RQPQSQNPKL             | Glycosylation-dependent cell adhesion molecule 1 | 1.8172             | 0.0001            | S                 | R                | P               | L                | 74             | 84           | 11        |
|  | IVQNNDSTEY             | Alpha-lactalbumin                                | 1.1108             | 0.0076            | A                 | I                | G               | L                | 60             | 70           | 11        |

|  | Sequence                 | Protein group                      | Log 10 fold change | p-value | Amino acid before | First amino acid | Last amino acid | Amino acid after | Start position | End position | Length |
|--|--------------------------|------------------------------------|--------------------|---------|-------------------|------------------|-----------------|------------------|----------------|--------------|--------|
|  | VSREGQEQEGEEMAEYRG       | Butyrophilin subfamily 1 member A1 | 0.6974             | 0.0030  | F                 | V                | G               | R                | 76             | 93           | 18     |
|  | KNVQTEIVNKHND            | Cysteine-rich secretory protein 2  | 1.1886             | 0.0008  | L                 | K                | D               | L                | 35             | 47           | 13     |
|  | KLDELKRQEVs              | Nucleobindin-1                     | 0.9952             | 0.0061  | T                 | K                | S               | R                | 96             | 106          | 11     |
|  | DELKRQEVs                | Nucleobindin-1                     | 0.7373             | 0.0028  | L                 | D                | S               | R                | 98             | 106          | 9      |
|  | HELDSASSEVN              | Osteopontin                        | 1.4522             | 0.0002  | S                 | H                | N               | -                | 268            | 278          | 11     |
|  | KPDPSQKQT                | Osteopontin                        | 0.7022             | 0.0081  | L                 | K                | T               | F                | 45             | 53           | 9      |
|  | GAAIQSRAGEIQN            | Polymeric immunoglobulin receptor  | 0.4862             | 0.0026  | A                 | G                | N               | K                | 580            | 592          | 13     |
|  | AAGGPGAPADPGRPTGYSG SSKA | Polymeric immunoglobulin receptor  | 0.5806             | 0.0074  | D                 | A                | A               | L                | 609            | 631          | 23     |
|  | KDLGEEHF                 | Serum albumin                      | 0.5609             | 0.0014  | F                 | K                | F               | K                | 35             | 42           | 8      |
|  | KVPQVSTPT                | Serum albumin                      | 1.3455             | 0.0022  | R                 | K                | T               | L                | 436            | 444          | 9      |

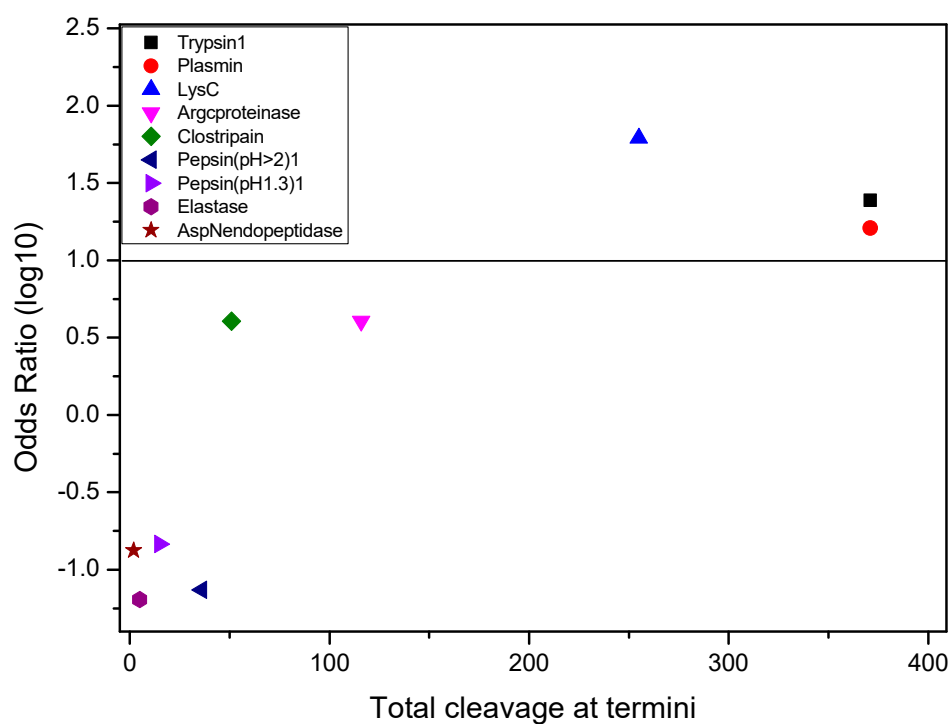

**Figure. S1.** Scatter plot of the total sites cleaved by an enzyme, at termini (x-axis) and log odds ratio (y-axis). Enzymes that are the most likely to be active in milk are those with a combined high number of total cleavages and a high odds ratio, represented by the top most right corner. For the enzymes that do not have expression in milk, data indicate the presence of other enzymes with similar activity.

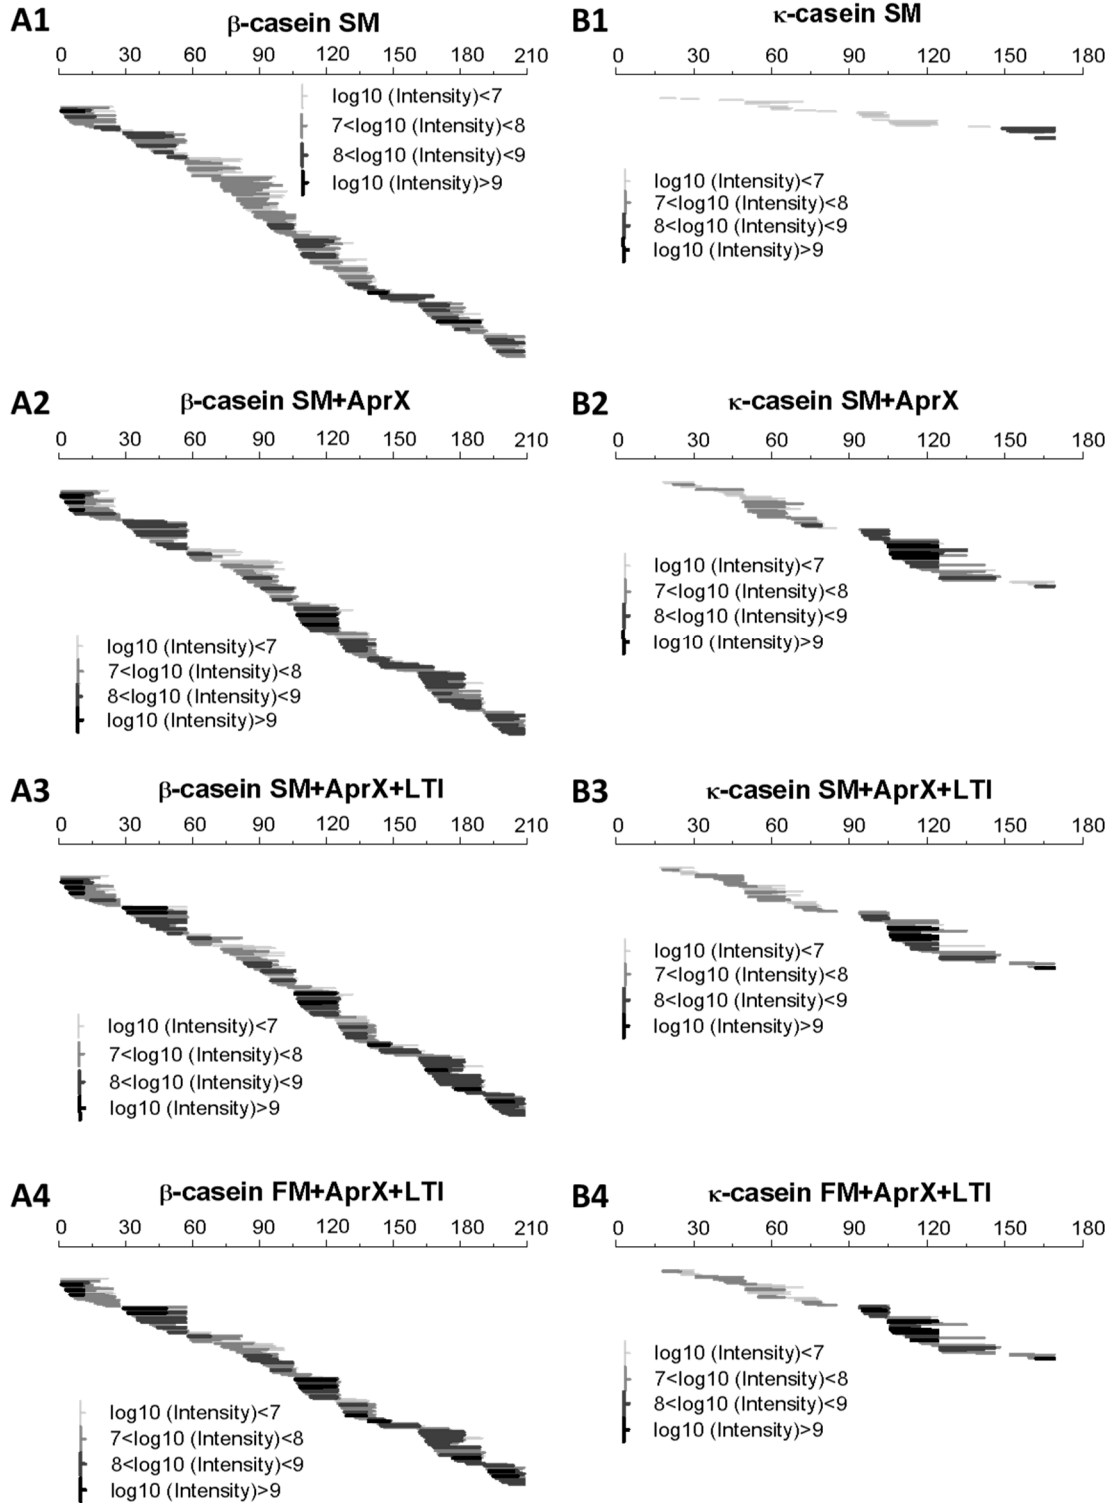

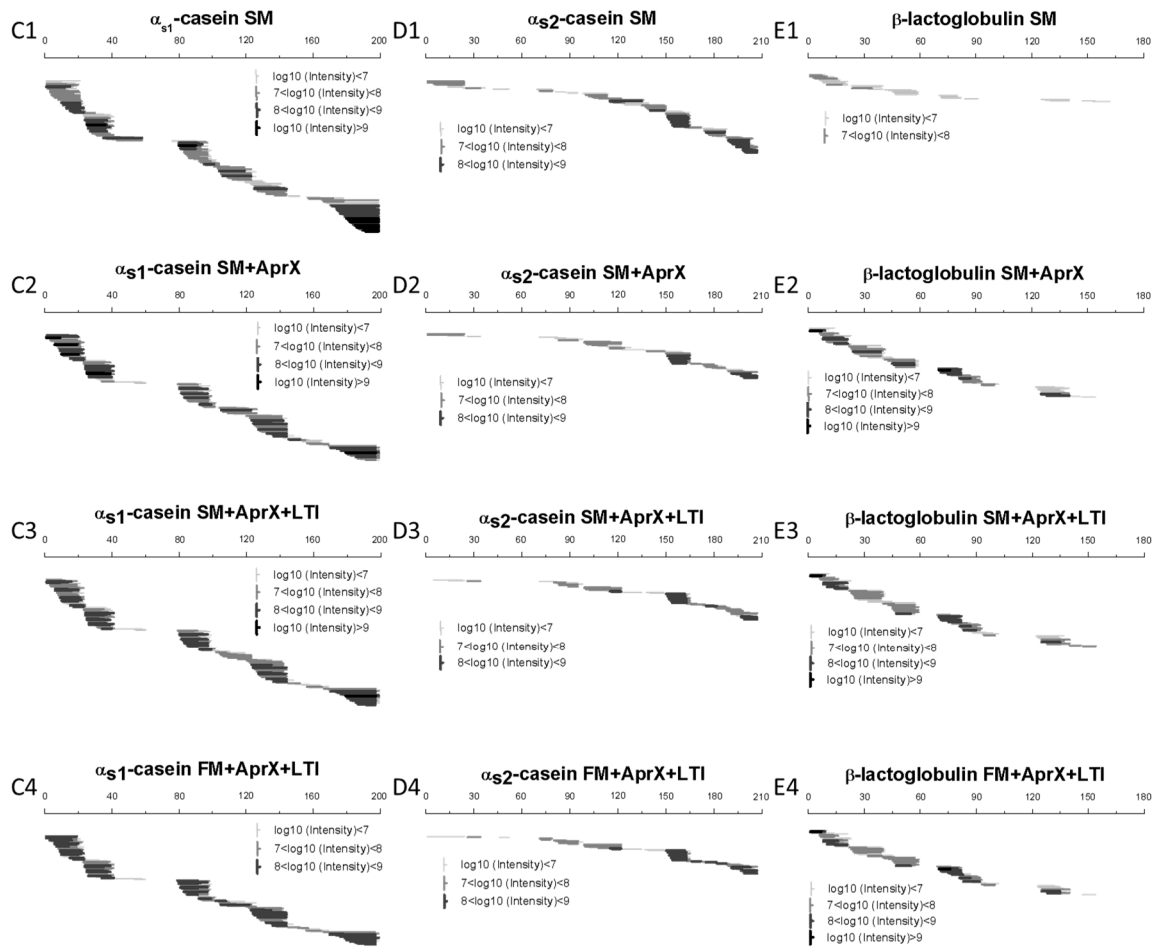

**Figure. S2.** Peptidomic profile from  $\beta$ -casein (A),  $\kappa$ -casein (B),  $\alpha_{s1}$ -casein (C),  $\alpha_{s2}$ -casein (D) and  $\beta$ -lactoglobulin (E) in SM, SM+AprX, SM+AprX+LTI and FM+AprX+LTI, respectively, analyzed by a nano-LC/LTQ and Orbitrap. MS/MS. Peptides with different intensity were distinguished by color and width. The intensity showed in the figure were the average value of triplicates.
